# Supplementary material
Source: ML conference proceedings conference paper supplement (https://proceedings.mlr.press/v164/feng22a.html)
Supplement: Supplementary file 2 [file feng22a-supp.zip]

Archive with 1 entries (1 files):
- 278-supp.pdf
